# Supplementary material
Source: PubMed Central journal article supplement (PMC5795392)
Supplement: supp_RA117.000425_133399_0_supp_15920_hybqh5.pdf [file supp_RA117.000425_133399_0_supp_15920_hybqh5.pdf]

**Supplementary Table S2:**

| <b>Data Identifier</b> | <b>Sample Type</b>                      |
|------------------------|-----------------------------------------|
| PXD006570              | Cytoplasmic proteins of elderly B cells |
| PXD006571              | Nuclear proteins of elderly B cells     |
| PXD006572              | Cytoplasmic proteins of young B cells   |
| PXD006576              | Nuclear proteins of young B cells       |
| PXD006578              | Cytoplasmic proteins of CLL cells       |
| PXD006589              | Nuclear proteins of CLL cells           |
| PXD006590              | Nuclear proteins of JVM-13 cells        |
| PXD006591              | Cytoplasmic proteins of JVM-13 cells    |
